# Supplementary material for: Process integrated biosensors for real-time monitoring of antibodies for automated affinity purification
Source: Royal Society of Chemistry journal article supplement (doi:10.1039/d2ay01567f), 2022-01-01
Supplement: d2ay01567f1.pdf [file d2ay01567f1.pdf]

## Supplementary Information

# Process Integrated Biosensors for Real-Time Monitoring of Antibodies for Automated Affinity Purification

*Thuy Tran<sup>1</sup>, Erik Martinsson<sup>2</sup>, Robert Gustavsson<sup>3</sup>, Otto Tronarp<sup>4</sup>, Mats Nilsson<sup>5</sup>, Kristoffer Rudenholm Hansson<sup>5</sup>, Ingemar Lundström<sup>6</sup>, Carl-Fredrik Mandenius<sup>3</sup>, Daniel Aili<sup>1</sup> ·\**

<sup>1</sup>Laboratory of Molecular Materials, Division of Biophysics and Bioengineering, Department of Physics, Chemistry and Biology, Linköping University, 581 83 Linköping, Sweden

<sup>2</sup>ArgusEye AB, Spannmålgatan 55, 583 36 Linköping, Sweden.

<sup>3</sup>Biotechnology, Division of Biophysics and Bioengineering, Department of Physics, Chemistry and Biology, Linköping University, 581 83 Linköping, Sweden

<sup>4</sup>Wolfram MathCore AB, Teknikringen 1E SE-583 30 Linköping, Sweden

<sup>5</sup>BioInvent International AB, Ideon Science Park, SE-223 70 Lund, Sweden.

<sup>6</sup>Sensor and Actuator Systems, Department of Physics, Chemistry and Biology, Linköping University, 581 83 Linköping, Sweden

\*Author to whom correspondence should be addressed: [daniel.aili@liu.se](mailto:daniel.aili@liu.se)

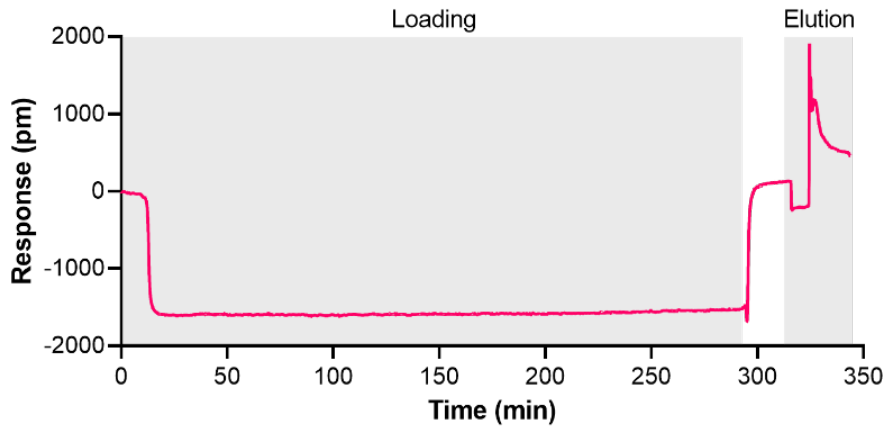

**Fig. S1** LSPR signals from an IgG purification step using an ÄKTA pilot system. Loaded mass was lower than the column capacity. Chromatography parameters: IgG cell culture supernatant 0.9 mg/mL, MabSelect HiTrap column 330 mL, flow rates: 200 mL/min for equilibration and washing, 70.5 mL/min for loading and elution, buffers: 20 mM sodium phosphate containing 150 mM NaCl, pH 7.2 for equilibration and washing, 50 mM citrate, pH 3.5 for elution.

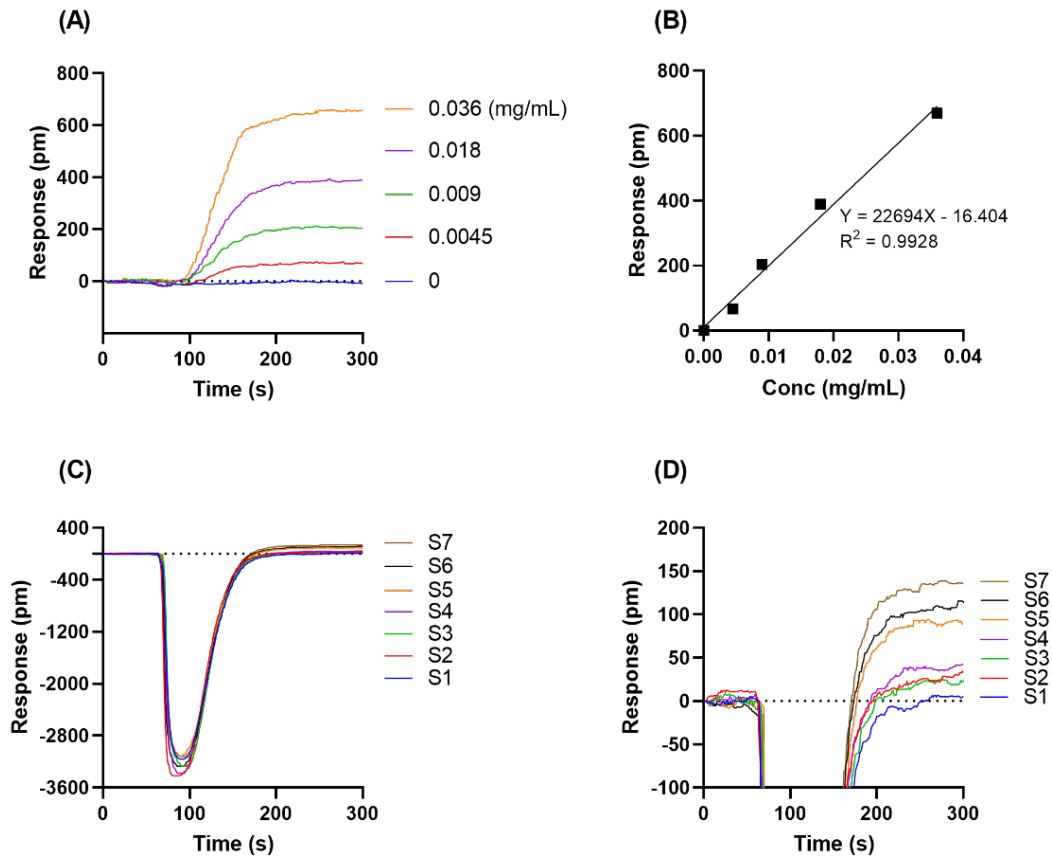

**Fig. S2** Off-line measurements using LSPR for titer quantification. (A) Sensorgrams of IgG standards with different concentrations. (B) Calibration curve plotted using binding response at 300 s in the sensorgrams. (C) Sensorgrams of seven fractions collected during the loading. (D) Zoomed-in area of figure (C) showing the difference in binding response of samples.
